# Supplementary material for: The generalized maximum hardness principle revisited and applied to atoms and molecules
Source: Royal Society of Chemistry journal article supplement (doi:10.1039/c7cp03101g), 2017-01-01
Supplement: c7cp03101g1.pdf [file c7cp03101g1.pdf]

## Supplementary Information

### The Generalized Maximum Hardness Principle revisited and applied to atoms and molecules (Part 1)

Wojciech Grochala

#### Contents.

Consider reactions:

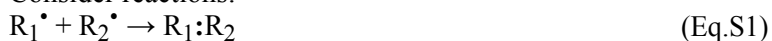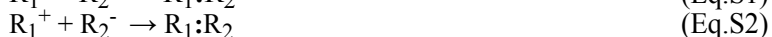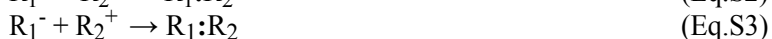

We will refer to these in sections S1-S4.

#### Tables.

*S1. Negative absolute ( $-\Delta\alpha$ ) and relative ( $-\Delta\alpha/\alpha_R$ ) polarizability change as well as negative energy change ( $-\Delta E$ ) for reactions described by Eqn.S1-S3. Data for heteronuclear molecules ( $R_1 \neq R_2$ ) where  $R_1, R_2$  are Group 1 elements. S2.*

*Negative absolute ( $-\Delta\alpha$ ) and relative ( $-\Delta\alpha/\alpha_R$ ) polarizability change as well as negative energy change ( $-\Delta E$ ) for reactions described by Eqn.S1. Data for two heteronuclear molecules ( $R_1 \neq R_2$ ) where  $R_1, R_2$  are Group 17 elements. S3. Negative absolute ( $-\Delta\alpha$ ) and relative ( $-\Delta\alpha/\alpha_R$ ) polarizability change as well as negative energy change ( $-\Delta E$ ) for reactions described by Eqn.S1-S3. Data for two selected heteronuclear molecules ( $R_1 \neq R_2$ ) where  $R_1, R_2$  are combinations of Group 1 and 17 elements.*

*S4. Negative absolute ( $-\Delta\alpha$ ) and relative ( $-\Delta\alpha/\alpha_R$ ) polarizability change as well as negative energy change ( $-\Delta E$ ) for reactions described by Eqn.S1. Data for systems where  $R_1=R_2$  and  $R_1, R_2$  are selected organic and inorganic radicals, diradicals or triradicals.*

Table S1. Negative absolute ( $-\Delta\alpha$ ) and relative ( $-\Delta\alpha/a_R$ ) polarizability change as well as negative energy change ( $-\Delta E$ ) for reactions described by Eqn.S1-S3. Data for heteronuclear molecules ( $R_1 \neq R_2$ ) where  $R_1, R_2$  are Group 1 elements.

| Reactants                        | $-\Delta\alpha$ /bohr <sup>3</sup> | $-\Delta\alpha/a_R$ /% | $-\Delta E$ /eV |
|----------------------------------|------------------------------------|------------------------|-----------------|
| H/Li                             | 139.1                              | 82.6                   | 2.47-2.52       |
| H <sup>+</sup> /Li <sup>-</sup>  | 1173.1                             | 97.8                   | 15.46-15.51     |
| H <sup>-</sup> /Li <sup>+</sup>  | 190.1                              | 87.9                   | 7.11-7.16       |
| H/Na                             | 121.4                              | 72.6                   | 1.95-2.08       |
| H <sup>+</sup> /Na <sup>-</sup>  | 1402.2                             | 96.8                   | 15.01-15.14     |
| H <sup>-</sup> /Na <sup>+</sup>  | 171.3                              | 78.9                   | 6.34-6.47       |
| H/K                              | 233.0                              | 79.0                   | 1.80-1.90       |
| H <sup>+</sup> /K <sup>-</sup>   | 2503.4                             | 97.6                   | 14.90-15.00     |
| H <sup>-</sup> /K <sup>+</sup>   | 159.5                              | 72.0                   | 5.39-5.49       |
| H/Rb                             | 257.2                              | 79.6                   | 1.73-1.77       |
| H <sup>+</sup> /Rb <sup>-</sup>  | 2913.0                             | 97.8                   | 14.85-14.89     |
| H <sup>-</sup> /Rb <sup>+</sup>  | 159.0                              | 70.6                   | 5.15-5.19       |
| H/Cs                             | 351.8                              | 86.8                   | 1.85-1.86       |
| H <sup>+</sup> /Cs <sup>-</sup>  | 3756.3                             | 98.6                   | 14.98-14.99     |
| H <sup>-</sup> /Cs <sup>+</sup>  | 178.0                              | 76.8                   | 4.99-5.00       |
| Li/Na                            | 56.8                               | 17.4                   | 0.91            |
| Li <sup>+</sup> /Na <sup>-</sup> | 1408.2                             | 97.2                   | 5.76            |
| Li <sup>-</sup> /Na <sup>+</sup> | 1160.3                             | 96.7                   | 5.43            |
| Li/Cs                            | -33.0                              | -5.5                   | 0.73            |
| Li <sup>+</sup> /Cs <sup>-</sup> | 3212.2                             | 84.3                   | 5.65            |
| Li <sup>-</sup> /Cs <sup>+</sup> | 616.9                              | 50.8                   | 4.01            |
| Na/K                             | 344.2                              | 75.9                   | 0.68            |
| Na <sup>+</sup> /K <sup>-</sup>  | 2515.5                             | 98.0                   | 5.53            |
| Na <sup>-</sup> /K <sup>+</sup>  | 1402.5                             | 96.5                   | 4.48            |
| K/Cs                             | 91.0                               | 13.2                   | 0.50            |
| K <sup>+</sup> /Cs <sup>-</sup>  | 3214.9                             | 84.3                   | 4.37            |
| K <sup>-</sup> /Cs <sup>+</sup>  | 1980.5                             | 76.7                   | 3.89            |

Table S2. Negative absolute ( $-\Delta\alpha$ ) and relative ( $-\Delta\alpha/\alpha_R$ ) polarizability change as well as negative energy change ( $-\Delta E$ ) for reactions described by Eqn.S1. Data for two heteronuclear molecules ( $R_1 \neq R_2$ ) where  $R_1, R_2$  are Group 17 elements.

| Reactants | $-\Delta\alpha$ /bohr <sup>3</sup> | $-\Delta\alpha/\alpha_R$ /% | $-\Delta E$ /eV |
|-----------|------------------------------------|-----------------------------|-----------------|
| Br/Cl     | -1.2/-2.3                          | -3.4/-6.5                   | 2.26            |
| I/Cl      | -33.3/-33.8/                       | -67.0/-68.7                 | 2.19            |

Table S3. Negative absolute ( $-\Delta\alpha$ ) and relative ( $-\Delta\alpha/\alpha_R$ ) polarizability change as well as negative energy change ( $-\Delta E$ ) for reactions described by Eqn.S1-S3. Data for two selected heteronuclear molecules ( $R_1 \neq R_2$ ) where  $R_1, R_2$  are combinations of Group 1 and 17 elements.

| Reactants                       | $-\Delta\alpha$ /bohr <sup>3</sup> | $-\Delta\alpha/\alpha_R$ /% | $-\Delta E$ /eV |
|---------------------------------|------------------------------------|-----------------------------|-----------------|
| H/F                             | 2.8                                | 34.1                        | 5.91            |
| H <sup>+</sup> /F <sup>-</sup>  | 5.1 <sup>[c]</sup>                 | 48.6 <sup>[c]</sup>         | 16.11           |
| H <sup>-</sup> /F <sup>+</sup>  | 212.4                              | 97.5                        | 22.59           |
| Li/F                            | 138.5                              | 82.6                        | 5.98±0.22       |
| Li <sup>+</sup> /F <sup>-</sup> | -18.5 <sup>[c]</sup>               | -181.4 <sup>[c]</sup>       | 7.97±0.22       |
| Li <sup>-</sup> /F <sup>+</sup> | 1170.3                             | 97.6                        | 22.79±0.22      |

Note, calculations of polarizability for halide anions are not reliable, as they tend to produce values which differ by a factor of 2. See a) Ø. Sørensen, L. Veseth, *Physica Scripta*. Vol. 52, 299-308, 1995; b) C. Hättig, B. A. Heß, *The Journal of Chemical Physics* 108, 3863 (1998), and references therein. Therefore, the tabularized data are for the smallest calculated polarizability of halide anions found in the literature. This certainly leads to qualitatively wrong tabularized  $-\Delta\alpha$  and  $-\Delta\alpha/\alpha_R$  values for Li<sup>+</sup>/F<sup>-</sup> and to quantitatively wrong values for H<sup>+</sup>/F<sup>-</sup>.

Table S4. Negative absolute ( $-\Delta\alpha$ ) and relative ( $-\Delta\alpha/\alpha_R$ ) polarizability change as well as negative energy change ( $-\Delta E$ ) for reactions described by Eqn.S1. Data for systems where  $R_1=R_2$  and  $R_1, R_2$  are selected organic and inorganic radicals, diradicals or triradicals.

| Reactants        | $-\Delta\alpha$ /bohr <sup>3</sup> | $-\Delta\alpha/\alpha_R$ /% | $-\Delta E$ /eV |
|------------------|------------------------------------|-----------------------------|-----------------|
| 2CH <sub>3</sub> | 3.59                               | 11.2                        | 3.82            |
| 2CH <sub>2</sub> | -1.23                              | -4.2                        | 7.07            |
| 2CH              | -1.33                              | -6.0                        | 9.98            |
| 2CF <sub>3</sub> | -17.5                              | -61.3                       | 4.21            |
| 2CN              | 15.24                              | 34.2                        | 6.25            |
| 2N               | 3.31                               | 22.3                        | 9.81            |
| 2NO <sub>2</sub> | 2.44                               | 6.2                         | 0.59            |
| 2NH <sub>2</sub> | -0.03                              | -0.1                        | 2.56-3.08       |
| 2OH              | -1.81                              | -18.6                       | 2.15            |
| 2O               | -0.06/+1.54                        | -0.6/+12.7                  | 5.12            |
